# Supplementary material
Source: MDPI journal article supplement (https://www.mdpi.com/2673-7426/4/1/13)
Supplement: s1 [file s1]

## Supplementary A: Application Details for RF-LIME And RF-Faust

To compute RF-LIME the R package “lime” published on CRAN and the R package “randomForestSRC” published on CRAN were used (<https://CRAN.R-project.org/package=randomForestSRC> and ” <https://CRAN.R-project.org/package=lime>). The Xgboost package is available on CRAN (<https://CRAN.R-project.org/package=xgboost>). The package “randomForestSRC is a fast OpenMP parallel computing of Breiman's random forests. The R package 'lime' is a port of the 'lime' 'Python' package.

The functionality of the package “lime” was applied in the default parameter setting. LIME explanation are based on a linear model with LASSO regularization. Although the value of penalty should influence the number of clusters in Tables 1-3, it was unfeasible to change this value in the R package due to a lack of documentation. Hence, this hypothesis could not be investigated further.

The computation random forests performed swiftly for the datasets. However, the computation of “lime” took a long time. We evaluated this explicitly with profiling (`utils::Rprof`) in the case of N=1500 of iris data with gaussian noise which yielded an overall computation time of 118 seconds of which the function `lime::explain` took 114 seconds itself. In Figure 5 the faceted heatmap of RF-LIME is shown of the LIME algorithm [24] using the R package “lime”.

Faust (<https://github.com/RGLab/FAUST>) provides cell-counts per populations as an output. Each population in FAUST is described in form of a set of  $CDi+$ ,  $CDj-$  conditions. Greene et al., provided several unsupervised and one supervised application based on a linear regression model for FAUST in their work [32]. Here, the

supervised application is adapted by using FAUST, as is proposed by the authors, as a feature extraction method and combining it with a typical random forest classifier because random forests are claimed to have the best performance [6].

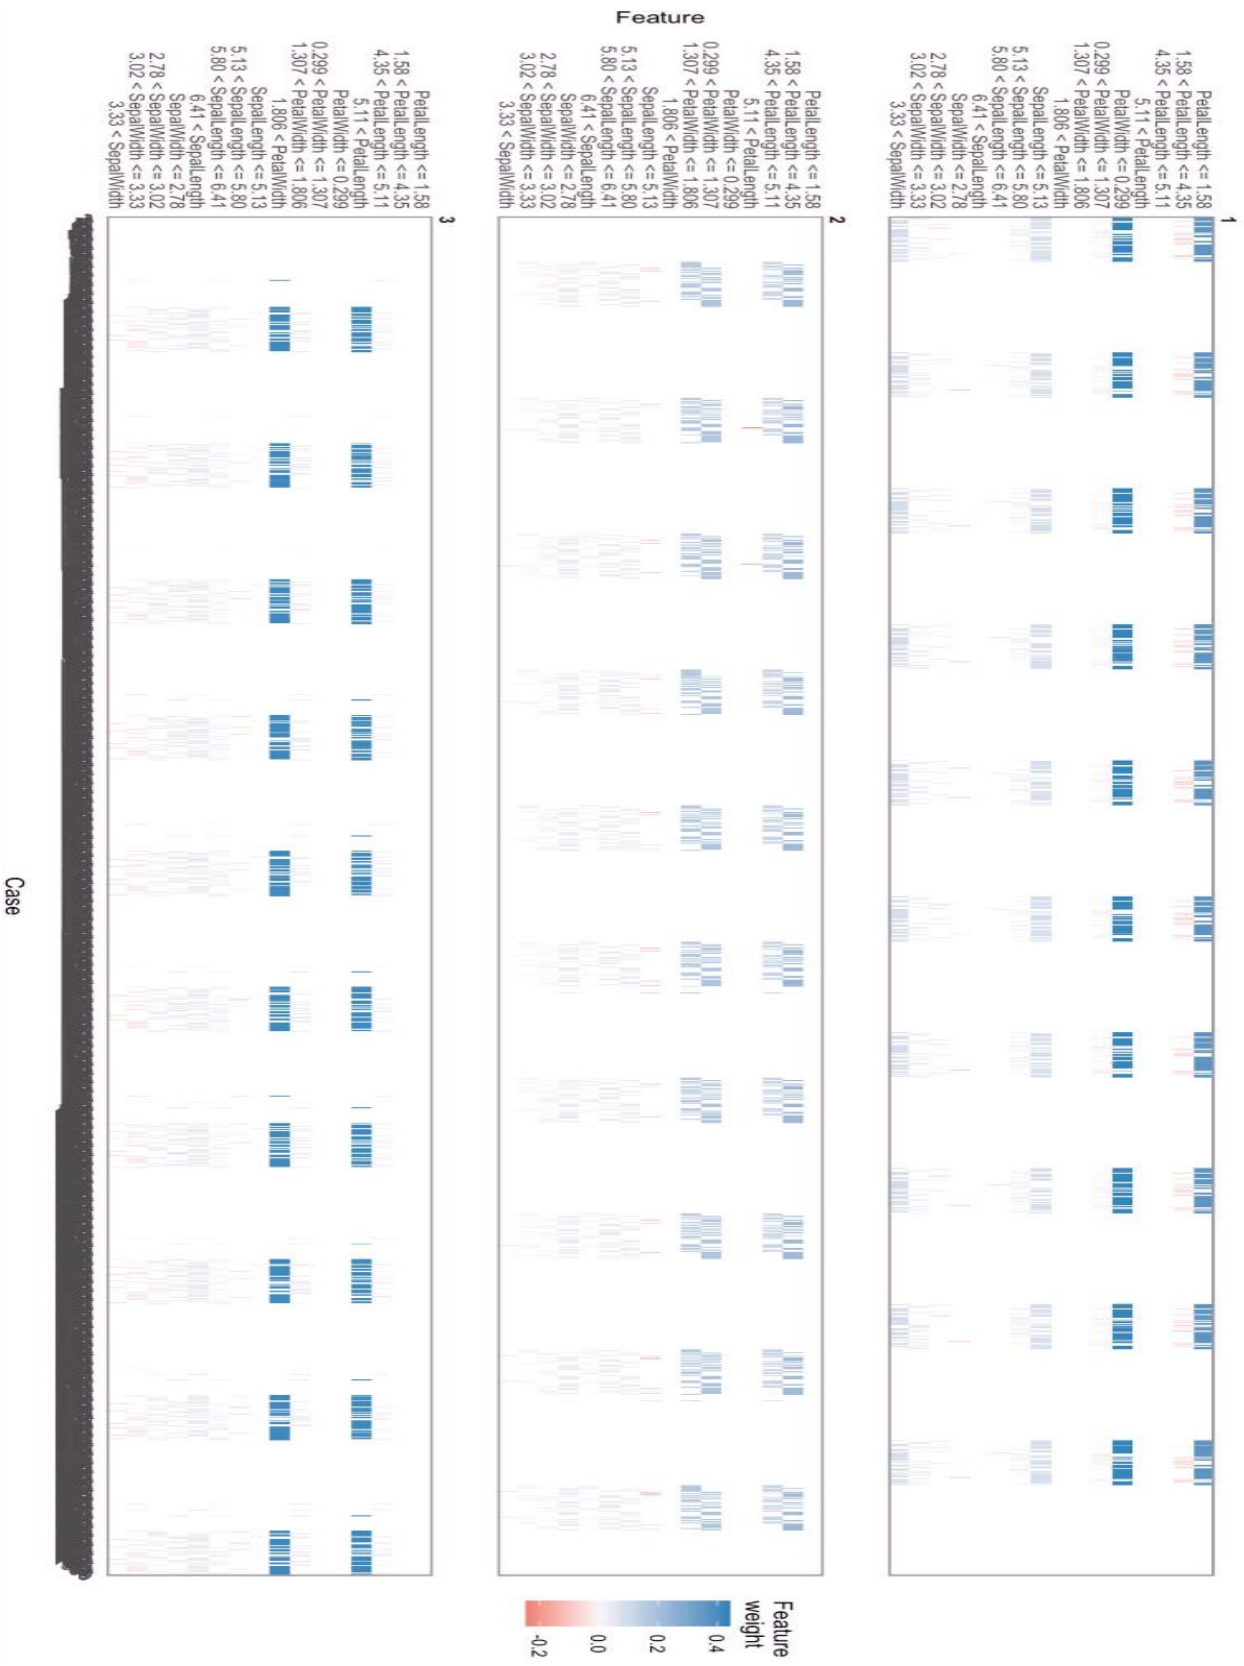

**Figure S1.** Facetted heatmap of RF-LIME for the Iris data.
